# Supplementary material
Source: publisher figshare collection journal article supplement (https://frontiersin.figshare.com/ndownloader/files/11928578)
Supplement: Supplementary file [file 11928578]

**SUPPLEMENTARY TABLE 3 |** Model predicting the association between antidepressants and change in HbA1c in diabetics, adjusting for body mass index.

|                                     | Full model<br>n=811    |                | 0 to 3 months<br>n=445 |                | 3 to 6 months<br>n=406 |                | 6 to 12 months<br>n=398 |                | 12 to 18 months<br>n=232 |                |
|-------------------------------------|------------------------|----------------|------------------------|----------------|------------------------|----------------|-------------------------|----------------|--------------------------|----------------|
|                                     | Mean<br>HbA1c<br>ratio | 95% CI         | Mean<br>HbA1c<br>ratio | 95% CI         | Mean<br>HbA1c<br>ratio | 95% CI         | Mean<br>HbA1c<br>ratio  | 95% CI         | Mean<br>HbA1c<br>ratio   | 95% CI         |
| Baseline HbA1c                      | 1.080                  | 1.066 to 1.093 | 1.093                  | 1.07 to 1.116  | 1.080                  | 1.05 to 1.111  | 1.069                   | 1.045 to 1.094 | 1.069                    | 1.033 to 1.105 |
| <b>ANTIDEPRESSANTS</b>              |                        |                |                        |                |                        |                |                         |                |                          |                |
| Citalopram                          | (ref)                  | (ref)          | (ref)                  | (ref)          | (ref)                  | (ref)          | (ref)                   | (ref)          | (ref)                    | (ref)          |
| Amitriptyline                       | 0.986                  | 0.939 to 1.035 | 1.015                  | 0.919 to 1.121 | 1.022                  | 0.925 to 1.130 | 0.958                   | 0.88 to 1.043  | 0.951                    | 0.849 to 1.065 |
| Venlafaxine                         | 0.984                  | 0.933 to 1.038 | 1.004                  | 0.902 to 1.117 | 1.005                  | 0.903 to 1.118 | 0.958                   | 0.87 to 1.056  | 0.981                    | 0.867 to 1.11  |
| Trazodone                           | 0.971                  | 0.918 to 1.027 | 0.995                  | 0.891 to 1.111 | 1.016                  | 0.906 to 1.139 | 0.948                   | 0.861 to 1.044 | 0.920                    | 0.797 to 1.062 |
| Escitalopram                        | 0.975                  | 0.909 to 1.046 | 0.995                  | 0.883 to 1.121 | 1.018                  | 0.868 to 1.193 | 0.942                   | 0.829 to 1.07  | 0.944                    | 0.769 to 1.158 |
| Exposure duration<br>(days)         | 1.000                  | 1.000 to 1.000 | 1.000                  | 0.999 to 1.001 | 1.000                  | 0.998 to 1.001 | 1.000                   | 0.999 to 1.001 | 1.000                    | 0.999 to 1.001 |
| <b>CHARACTERISTICS</b>              |                        |                |                        |                |                        |                |                         |                |                          |                |
| Age                                 | 0.999                  | 0.997 to 1.000 | 0.999                  | 0.997 to 1.002 | 0.999                  | 0.996 to 1.002 | 0.998                   | 0.995 to 1.000 | 0.998                    | 0.995 to 1.002 |
| Sex (Women)                         | 1.009                  | 0.975 to 1.045 | 1.008                  | 0.941 to 1.079 | 1.017                  | 0.946 to 1.094 | 1.011                   | 0.95 to 1.075  | 0.996                    | 0.912 to 1.087 |
| BMI                                 | 0.998                  | 0.995 to 1.000 | 0.999                  | 0.994 to 1.004 | 0.998                  | 0.993 to 1.004 | 0.997                   | 0.992 to 1.001 | 0.996                    | 0.989 to 1.002 |
| Depression                          | 0.974                  | 0.937 to 1.012 | 1.000                  | 0.928 to 1.079 | 0.983                  | 0.908 to 1.064 | 0.949                   | 0.887 to 1.015 | 0.966                    | 0.877 to 1.062 |
| <b>ANTIDIABETIC MEDICATION TYPE</b> |                        |                |                        |                |                        |                |                         |                |                          |                |
| No diabetes<br>medication           | (ref)                  | (ref)          | (ref)                  | (ref)          | (ref)                  | (ref)          | (ref)                   | (ref)          | (ref)                    | (ref)          |
| Insulin and non-<br>insulin         | 1.113                  | 1.041 to 1.189 | 1.064                  | 0.945 to 1.198 | 1.093                  | 0.954 to 1.253 | 1.159                   | 1.018 to 1.319 | 1.140                    | 0.962 to 1.351 |
| Insulin only                        | 1.118                  | 1.023 to 1.221 | 1.051                  | 0.888 to 1.244 | 1.117                  | 0.931 to 1.339 | 1.150                   | 0.97 to 1.365  | 1.172                    | 0.957 to 1.437 |
| Non-insulin only                    | 1.023                  | 0.962 to 1.087 | 1.003                  | 0.899 to 1.119 | 1.024                  | 0.905 to 1.158 | 1.028                   | 0.911 to 1.16  | 1.044                    | 0.892 to 1.222 |

Gagnon J, Lussier M-T, MacGibbon B, Daskalopoulou SS and Bartlett G (2018) The Impact of Antidepressant Therapy on Glycemic Control in Canadian Primary Care Patients With Diabetes Mellitus. Front. Nutr. 5:47. doi: 10.3389/fnut.2018.00047
